# Supplementary material
Source: publisher figshare collection journal article supplement (https://acs.figshare.com/ndownloader/files/5195905)
Supplement: Supplementary file 1 [file 5195905]

Supporting Information 2
#==============================================================================

data___[Mn2(saltmen)2Ni(pao)2(py)2](PF6)2

#==============================================================================

# CHEMICAL DATA

_chemical_formula_sum                  'C62 H64 F12 N10 Mn2 O6 Ni P2 '
_chemical_formula_moiety               'C62 H64 F12 N10 Mn2 O6 Ni P2 '
_chemical_formula_weight               1503.76
_chemical_melting_point                ?

#==============================================================================

# CRYSTAL DATA
_symmetry_cell_setting                 monoclinic
_symmetry_space_group_name_H-M        'C 1 2/c 1'
_symmetry_Int_Tables_number            15
loop_
_symmetry_equiv_pos_as_xyz
 'x,y,z'
 '-x,-y,-z'
 'x+1/2,y+1/2,z'
 '-x+1/2,-y+1/2,-z'
 '-x,y,-z+1/2'
 'x,-y,z+1/2'
 '-x+1/2,y+1/2,-z+1/2'
 'x+1/2,-y+1/2,z+1/2'

#------------------------------------------------------------------------------

_cell_length_a                         21.173(3)
_cell_length_b                         16.097(1)
_cell_length_c                         19.024(2)
_cell_angle_alpha                      90
_cell_angle_beta                       98.946(4)
_cell_angle_gamma                      90
_cell_volume                           6404.9(1)
_cell_formula_units_Z                  4
_cell_measurement_reflns_used          22858
_cell_measurement_theta_min            1.6
_cell_measurement_theta_max            13.8
_cell_measurement_temperature          103.0

#------------------------------------------------------------------------------

_exptl_crystal_description            'block'
_exptl_crystal_colour                 'brown'
_exptl_crystal_size_max                0.15
_exptl_crystal_size_mid                0.13
_exptl_crystal_size_min                0.10
_exptl_crystal_density_diffrn          1.559
_exptl_crystal_density_meas            ?
_exptl_crystal_density_method         'not measured'
_exptl_crystal_F_000                   3080.00
_exptl_absorpt_coefficient_mu          0.824
_exptl_absorpt_correction_type         psi-scans
_exptl_absorpt_process_details         '(North, Phillips & Mathews, 1968)'
_exptl_absorpt_correction_T_min        0.557
_exptl_absorpt_correction_T_max        0.921

#==============================================================================

# EXPERIMENTAL DATA

_diffrn_radiation_type                'Mo K�a'
_diffrn_radiation_wavelength           0.7107
_diffrn_measurement_device_type       'Rigaku RAXIS-RAPID'
_diffrn_measurement_method             �w
_diffrn_detector_area_resol_mean       10.00
_diffrn_reflns_number                  28305
_diffrn_reflns_av_R_equivalents        0.090
_diffrn_reflns_theta_max               27.49
_diffrn_measured_fraction_theta_max    0.9622
_diffrn_reflns_theta_full              27.49
_diffrn_measured_fraction_theta_full   0.9622
_diffrn_reflns_limit_h_min             -26
_diffrn_reflns_limit_h_max             26
_diffrn_reflns_limit_k_min             -20
_diffrn_reflns_limit_k_max             20
_diffrn_reflns_limit_l_min             -23
_diffrn_reflns_limit_l_max             24

#==============================================================================

# REFINEMENT DATA

_refine_special_details
;
    Refinement using reflections with F^2^ > 0.0 sigma(F^2^).
    The weighted R-factor (wR) and goodness of fit (S) are based on F^2^.
    R-factor (gt) are based on F. The threshold expression of
    F^2^ > 2.0 sigma(F^2^) is used only for calculating R-factor (gt).
;
_reflns_number_total                   7107
_reflns_number_gt                      3889
_reflns_threshold_expression           F^2^>2.0�s(F^2^)
_refine_ls_structure_factor_coef       Fsqd
_refine_ls_R_factor_gt                 0.0600
_refine_ls_wR_factor_ref               0.1320
_refine_ls_hydrogen_treatment          refall
_refine_ls_number_reflns               7107
_refine_ls_number_parameters           431
_refine_ls_goodness_of_fit_ref         1.014
_refine_ls_weighting_scheme            calc
_refine_ls_weighting_details
'w = 1/[0.0007Fo^2^ + 1.0000�s^2^(Fo) + 0.0000]/(4Fo^2^)'
_refine_ls_shift/su_max                0.0000
_refine_diff_density_max               1.62
_refine_diff_density_min               -1.50
_refine_ls_extinction_method           none
_refine_ls_extinction_coef             ?

loop_
_atom_type_symbol
_atom_type_description
_atom_type_scat_dispersion_real
_atom_type_scat_dispersion_imag
_atom_type_scat_source
  'C' 'C'  0.003 0.002 
;
International Tables for Crystallography
(1992, Vol. C, Tables 4.2.6.8 and 6.1.1.4)
;
  'H' 'H'  0.000 0.000 
;
International Tables for Crystallography
(1992, Vol. C, Table 6.1.1.4)
;
  'F' 'F'  0.017 0.010 
;
International Tables for Crystallography
(1992, Vol. C, Tables 4.2.6.8 and 6.1.1.4)
;
  'N' 'N'  0.006 0.003 
;
International Tables for Crystallography
(1992, Vol. C, Tables 4.2.6.8 and 6.1.1.4)
;
  'Mn' 'Mn'  0.337 0.728 
;
International Tables for Crystallography
(1992, Vol. C, Tables 4.2.6.8 and 6.1.1.4)
;
  'O' 'O'  0.011 0.006 
;
International Tables for Crystallography
(1992, Vol. C, Tables 4.2.6.8 and 6.1.1.4)
;
  'Ni' 'Ni'  0.339 1.112 
;
International Tables for Crystallography
(1992, Vol. C, Tables 4.2.6.8 and 6.1.1.4)
;
  'P' 'P'  0.102 0.094 
;
International Tables for Crystallography
(1992, Vol. C, Tables 4.2.6.8 and 6.1.1.4)
;

#==============================================================================

# ATOMIC COORDINATES AND THERMAL PARAMETERS

loop_
_atom_site_label
_atom_site_type_symbol
_atom_site_fract_x
_atom_site_fract_y
_atom_site_fract_z
_atom_site_U_iso_or_equiv
_atom_site_adp_type
_atom_site_occupancy
_atom_site_symmetry_multiplicity
_atom_site_calc_flag
_atom_site_refinement_flags
_atom_site_disorder_assembly
_atom_site_disorder_group
 Ni1    Ni 0.5000      0.25842(5)  0.2500      0.0278(2)   Uani 1.00 1 d . . .
 Mn1    Mn 0.31596(3)  0.20654(4)  0.04929(3)  0.0238(2)   Uani 1.00 1 d . . .
 P1     P  0.38342(7)  -0.23744(8) 0.15054(7)  0.0456(4)   Uani 1.00 1 d . . .
 F1     F  0.4087(2)   -0.1487(2)  0.1348(2)   0.087(1)    Uani 1.00 1 d . . .
 F2     F  0.3365(2)   -0.2276(3)  0.0790(2)   0.110(2)    Uani 1.00 1 d . . .
 F3     F  0.4380(2)   -0.2774(2)  0.1127(2)   0.091(1)    Uani 1.00 1 d . . .
 F4     F  0.3582(3)   -0.3258(2)  0.1612(3)   0.146(2)    Uani 1.00 1 d . . .
 F5     F  0.4296(2)   -0.2447(3)  0.2235(2)   0.120(2)    Uani 1.00 1 d . . .
 F6     F  0.3322(2)   -0.1985(2)  0.1926(2)   0.079(1)    Uani 1.00 1 d . . .
 O1     O  0.2888(1)   0.3185(2)   0.0327(1)   0.0261(8)   Uani 1.00 1 d . . .
 O2     O  0.2638(1)   0.1895(2)   0.1192(1)   0.0315(9)   Uani 1.00 1 d . . .
 O3     O  0.3987(1)   0.2445(2)   0.1173(1)   0.0322(8)   Uani 1.00 1 d . . .
 N1     N  0.3676(2)   0.2113(2)   -0.0297(2)  0.027(1)    Uani 1.00 1 d . . .
 N2     N  0.3338(2)   0.0863(2)   0.0417(2)   0.025(1)    Uani 1.00 1 d . . .
 N3     N  0.4107(2)   0.2567(3)   0.1864(3)   0.064(2)    Uani 1.00 1 d . . .
 N4     N  0.4372(2)   0.2614(2)   0.3255(2)   0.042(1)    Uani 1.00 1 d . . .
 N5     N  0.5000      0.3901(3)   0.2500      0.034(2)    Uani 1.00 1 d . . .
 N6     N  0.5000      0.1263(3)   0.2500      0.035(2)    Uani 1.00 1 d . . .
 C1     C  0.3285(2)   0.3779(3)   0.0163(2)   0.030(1)    Uani 1.00 1 d . . .
 C2     C  0.3212(2)   0.4595(3)   0.0388(3)   0.037(1)    Uani 1.00 1 d . . .
 C3     C  0.3587(2)   0.5232(3)   0.0199(3)   0.048(2)    Uani 1.00 1 d . . .
 C4     C  0.4050(3)   0.5077(3)   -0.0229(3)  0.055(2)    Uani 1.00 1 d . . .
 C5     C  0.4139(2)   0.4282(3)   -0.0456(3)  0.048(2)    Uani 1.00 1 d . . .
 C6     C  0.3769(2)   0.3614(3)   -0.0254(2)  0.032(1)    Uani 1.00 1 d . . .
 C7     C  0.3892(2)   0.2801(3)   -0.0512(2)  0.032(1)    Uani 1.00 1 d . . .
 C8     C  0.3799(2)   0.1302(3)   -0.0636(2)  0.030(1)    Uani 1.00 1 d . . .
 C9     C  0.4422(2)   0.1320(3)   -0.0959(3)  0.040(1)    Uani 1.00 1 d . . .
 C10    C  0.3232(2)   0.1156(3)   -0.1224(2)  0.034(1)    Uani 1.00 1 d . . .
 C11    C  0.3840(2)   0.0639(3)   -0.0025(2)  0.028(1)    Uani 1.00 1 d . . .
 C12    C  0.4476(2)   0.0697(3)   0.0481(2)   0.035(1)    Uani 1.00 1 d . . .
 C13    C  0.3748(2)   -0.0238(3)  -0.0333(2)  0.037(1)    Uani 1.00 1 d . . .
 C14    C  0.3116(2)   0.0294(3)   0.0800(2)   0.031(1)    Uani 1.00 1 d . . .
 C15    C  0.2702(2)   0.0422(3)   0.1318(2)   0.034(1)    Uani 1.00 1 d . . .
 C16    C  0.2516(3)   -0.0296(3)  0.1666(3)   0.052(2)    Uani 1.00 1 d . . .
 C17    C  0.2137(3)   -0.0231(4)  0.2188(3)   0.061(2)    Uani 1.00 1 d . . .
 C18    C  0.1932(3)   0.0546(3)   0.2371(3)   0.051(2)    Uani 1.00 1 d . . .
 C19    C  0.2105(2)   0.1251(3)   0.2036(3)   0.042(2)    Uani 1.00 1 d . . .
 C20    C  0.2489(2)   0.1206(3)   0.1500(2)   0.032(1)    Uani 1.00 1 d . . .
 C21    C  0.3612(3)   0.2660(3)   0.2244(3)   0.061(2)    Uani 1.00 1 d . . .
 C22    C  0.3757(3)   0.2657(3)   0.2994(3)   0.048(2)    Uani 1.00 1 d . . .
 C23    C  0.3270(3)   0.2655(3)   0.3424(3)   0.059(2)    Uani 1.00 1 d . . .
 C24    C  0.3450(3)   0.2632(3)   0.4150(3)   0.064(2)    Uani 1.00 1 d . . .
 C25    C  0.4093(3)   0.2627(3)   0.4435(3)   0.061(2)    Uani 1.00 1 d . . .
 C26    C  0.4542(3)   0.2619(3)   0.3974(3)   0.053(2)    Uani 1.00 1 d . . .
 C27    C  0.5302(2)   0.4329(3)   0.3049(3)   0.040(1)    Uani 1.00 1 d . . .
 C28    C  0.5314(2)   0.5188(3)   0.3074(3)   0.042(1)    Uani 1.00 1 d . . .
 C29    C  0.5000      0.5633(4)   0.2500      0.038(2)    Uani 1.00 1 d . . .
 C30    C  0.4461(2)   0.0825(3)   0.2474(3)   0.047(2)    Uani 1.00 1 d . . .
 C31    C  0.4438(3)   -0.0026(3)  0.2457(3)   0.053(2)    Uani 1.00 1 d . . .
 C32    C  0.5000      -0.0493(4)  0.2500      0.042(2)    Uani 1.00 1 d . . .
 H1     H  0.2896(2)   0.4713(3)   0.0677(3)   0.043(2)    Uiso 1.00 1 c . . .
 H2     H  0.3529(2)   0.5780(3)   0.0362(3)   0.056(2)    Uiso 1.00 1 c . . .
 H3     H  0.4303(3)   0.5519(3)   -0.0364(3)  0.064(2)    Uiso 1.00 1 c . . .
 H4     H  0.4452(2)   0.4177(3)   -0.0753(3)  0.057(2)    Uiso 1.00 1 c . . .
 H5     H  0.4156(2)   0.2767(3)   -0.0871(2)  0.038(2)    Uiso 1.00 1 c . . .
 H6     H  0.4473(2)   0.0806(3)   -0.1189(3)  0.050(2)    Uiso 1.00 1 c . . .
 H7     H  0.4401(2)   0.1758(3)   -0.1298(3)  0.050(2)    Uiso 1.00 1 c . . .
 H8     H  0.4774(2)   0.1408(3)   -0.0594(3)  0.050(2)    Uiso 1.00 1 c . . .
 H9     H  0.2853(2)   0.1097(3)   -0.1020(2)  0.040(2)    Uiso 1.00 1 c . . .
 H10    H  0.3189(2)   0.1615(3)   -0.1542(2)  0.040(2)    Uiso 1.00 1 c . . .
 H11    H  0.3302(2)   0.0664(3)   -0.1478(2)  0.040(2)    Uiso 1.00 1 c . . .
 H12    H  0.4476(2)   0.0317(3)   0.0862(2)   0.042(2)    Uiso 1.00 1 c . . .
 H13    H  0.4818(2)   0.0566(3)   0.0229(2)   0.042(2)    Uiso 1.00 1 c . . .
 H14    H  0.4532(2)   0.1246(3)   0.0664(2)   0.042(2)    Uiso 1.00 1 c . . .
 H15    H  0.3313(2)   -0.0314(3)  -0.0538(2)  0.044(2)    Uiso 1.00 1 c . . .
 H16    H  0.4013(2)   -0.0312(3)  -0.0689(2)  0.044(2)    Uiso 1.00 1 c . . .
 H17    H  0.3861(2)   -0.0634(3)  0.0035(2)   0.044(2)    Uiso 1.00 1 c . . .
 H18    H  0.3242(2)   -0.0262(3)  0.0730(2)   0.037(2)    Uiso 1.00 1 c . . .
 H19    H  0.2654(3)   -0.0829(3)  0.1535(3)   0.064(2)    Uiso 1.00 1 c . . .
 H20    H  0.2018(3)   -0.0713(4)  0.2424(3)   0.075(2)    Uiso 1.00 1 c . . .
 H21    H  0.1670(3)   0.0594(3)   0.2731(3)   0.063(2)    Uiso 1.00 1 c . . .
 H22    H  0.1961(2)   0.1777(3)   0.2170(2)   0.051(2)    Uiso 1.00 1 c . . .
 H23    H  0.3182(3)   0.2724(3)   0.2008(3)   0.073(2)    Uiso 1.00 1 c . . .
 H24    H  0.2833(3)   0.2671(3)   0.3218(3)   0.072(2)    Uiso 1.00 1 c . . .
 H25    H  0.3134(3)   0.2619(3)   0.4453(3)   0.080(2)    Uiso 1.00 1 c . . .
 H26    H  0.4224(3)   0.2629(3)   0.4938(3)   0.075(2)    Uiso 1.00 1 c . . .
 H27    H  0.4985(3)   0.2616(3)   0.4168(3)   0.065(2)    Uiso 1.00 1 c . . .
 H28    H  0.5525(2)   0.4027(3)   0.3442(3)   0.046(2)    Uiso 1.00 1 c . . .
 H29    H  0.5533(2)   0.5468(3)   0.3479(3)   0.048(2)    Uiso 1.00 1 c . . .
 H30    H  0.50000(1)  0.6223(4)   0.25000(1)  0.046(2)    Uiso 1.00 1 c . . .
 H31    H  0.4071(2)   0.1120(3)   0.2467(3)   0.057(2)    Uiso 1.00 1 c . . .
 H32    H  0.4037(3)   -0.0302(3)  0.2416(3)   0.064(2)    Uiso 1.00 1 c . . .
 H33    H  0.50000(1)  -0.1083(4)  0.25000(1)  0.051(2)    Uiso 1.00 1 c . . .


loop_
_atom_site_aniso_label
_atom_site_aniso_U_11
_atom_site_aniso_U_22
_atom_site_aniso_U_33
_atom_site_aniso_U_12
_atom_site_aniso_U_13
_atom_site_aniso_U_23
 Ni1    0.0264(5)   0.0247(4)   0.0296(4)   0.0000      -0.0047(4)  0.0000     
 Mn1    0.0211(4)   0.0247(3)   0.0254(3)   0.0073(3)   0.0030(3)   0.0004(3)  
 P1     0.0505(9)   0.0363(7)   0.0534(8)   -0.0027(6)  0.0185(7)   0.0005(6)  
 F1     0.084(3)    0.046(2)    0.136(3)    -0.014(2)   0.032(2)    0.009(2)   
 F2     0.074(3)    0.199(5)    0.055(2)    -0.019(3)   0.001(2)    -0.015(3)  
 F3     0.096(3)    0.087(3)    0.102(3)    0.034(2)    0.051(2)    0.014(2)   
 F4     0.202(5)    0.052(2)    0.215(5)    -0.047(3)   0.130(5)    -0.025(3)  
 F5     0.119(4)    0.159(4)    0.072(3)    0.079(3)    -0.011(2)   0.002(3)   
 F6     0.087(3)    0.089(3)    0.070(2)    0.033(2)    0.042(2)    0.015(2)   
 O1     0.019(2)    0.022(2)    0.037(2)    0.002(1)    0.003(1)    -0.002(1)  
 O2     0.034(2)    0.030(2)    0.033(2)    0.010(1)    0.014(1)    0.003(1)   
 O3     0.033(2)    0.038(2)    0.024(2)    -0.002(1)   -0.001(1)   -0.006(1)  
 N1     0.019(2)    0.032(2)    0.031(2)    0.004(2)    0.003(1)    -0.001(2)  
 N2     0.020(2)    0.028(2)    0.028(2)    0.004(1)    0.003(1)    -0.003(1)  
 N3     0.054(3)    0.070(3)    0.061(3)    0.030(3)    -0.012(3)   -0.022(2)  
 N4     0.044(3)    0.034(2)    0.048(3)    -0.001(2)   0.011(2)    0.001(2)   
 N5     0.032(3)    0.026(3)    0.044(3)    0.0000      0.010(3)    0.0000     
 N6     0.033(3)    0.029(3)    0.042(3)    0.0000      0.005(3)    0.0000     
 C1     0.022(2)    0.027(2)    0.037(3)    0.002(2)    -0.004(2)   -0.003(2)  
 C2     0.023(3)    0.026(2)    0.060(3)    0.000(2)    -0.001(2)   -0.008(2)  
 C3     0.037(3)    0.033(3)    0.070(4)    -0.003(2)   -0.002(3)   -0.009(2)  
 C4     0.039(3)    0.032(3)    0.091(4)    -0.011(2)   0.001(3)    0.004(3)   
 C5     0.031(3)    0.042(3)    0.069(4)    -0.007(2)   0.007(3)    -0.000(3)  
 C6     0.020(2)    0.031(2)    0.044(3)    -0.001(2)   0.002(2)    0.002(2)   
 C7     0.020(2)    0.038(3)    0.038(3)    -0.001(2)   0.007(2)    -0.002(2)  
 C8     0.025(3)    0.031(2)    0.034(3)    0.007(2)    0.008(2)    -0.007(2)  
 C9     0.033(3)    0.044(3)    0.045(3)    0.008(2)    0.017(2)    -0.004(2)  
 C10    0.036(3)    0.036(3)    0.029(2)    0.006(2)    0.002(2)    -0.002(2)  
 C11    0.023(2)    0.029(2)    0.033(2)    0.005(2)    0.009(2)    -0.005(2)  
 C12    0.028(3)    0.036(3)    0.041(3)    0.014(2)    0.005(2)    -0.002(2)  
 C13    0.036(3)    0.033(3)    0.042(3)    0.009(2)    0.008(2)    -0.005(2)  
 C14    0.029(3)    0.025(2)    0.039(3)    0.006(2)    0.004(2)    -0.000(2)  
 C15    0.031(3)    0.035(3)    0.036(3)    0.002(2)    0.007(2)    0.004(2)   
 C16    0.058(4)    0.040(3)    0.064(4)    -0.002(3)   0.026(3)    0.006(3)   
 C17    0.064(4)    0.055(4)    0.070(4)    -0.014(3)   0.031(3)    0.006(3)   
 C18    0.050(3)    0.063(4)    0.046(3)    -0.012(3)   0.024(3)    -0.002(3)  
 C19    0.039(3)    0.047(3)    0.041(3)    0.001(2)    0.014(2)    -0.004(2)  
 C20    0.029(3)    0.035(3)    0.032(2)    0.003(2)    0.004(2)    0.003(2)   
 C21    0.043(4)    0.056(4)    0.083(4)    0.011(3)    0.010(3)    -0.009(3)  
 C22    0.064(4)    0.042(3)    0.043(3)    0.003(3)    0.020(3)    -0.006(2)  
 C23    0.060(4)    0.059(4)    0.063(4)    0.013(3)    0.026(3)    -0.011(3)  
 C24    0.082(5)    0.056(4)    0.062(4)    0.017(3)    0.041(4)    0.005(3)   
 C25    0.082(5)    0.059(4)    0.046(3)    0.015(3)    0.026(3)    0.004(3)   
 C26    0.086(4)    0.036(3)    0.041(3)    0.006(3)    0.019(3)    0.002(2)   
 C27    0.035(3)    0.034(3)    0.049(3)    0.002(2)    -0.000(2)   0.003(2)   
 C28    0.037(3)    0.032(3)    0.053(3)    -0.004(2)   -0.005(2)   -0.003(2)  
 C29    0.036(4)    0.027(4)    0.050(4)    0.0000      0.005(3)    0.0000     
 C30    0.037(3)    0.041(3)    0.065(3)    -0.003(2)   0.014(3)    -0.001(2)  
 C31    0.048(4)    0.043(3)    0.068(4)    -0.010(3)   0.011(3)    -0.002(3)  
 C32    0.061(5)    0.036(4)    0.032(4)    0.0000      0.016(3)    0.0000     

#==============================================================================

_computing_data_collection            'PROCESS-AUTO'
_computing_cell_refinement            'PROCESS-AUTO'
_computing_data_reduction             'CrystalStructure'
_computing_structure_solution         'SIR92'
_computing_structure_refinement       'CRYSTALS'
_computing_publication_material       'CrystalStructure Ver. 3.00'
_computing_molecular_graphics          ?

#==============================================================================

# MOLECULAR GEOMETRY

_geom_special_details
;
    ENTER SPECIAL DETAILS OF THE MOLECULAR GEOMETRY
;

 
loop_
 _geom_bond_atom_site_label_1
 _geom_bond_site_symmetry_1
 _geom_bond_atom_site_label_2
 _geom_bond_site_symmetry_2
 _geom_bond_distance
 _geom_bond_publ_flag
Ni1 . N3 . 2.081(4) yes
Ni1 . N4 . 2.104(4) yes
Ni1 . N5 . 2.119(5) yes
Ni1 . N6 . 2.126(5) yes
Mn1 . O1 . 1.903(3) yes
Mn1 . O2 . 1.876(3) yes
Mn1 . O3 . 2.100(3) yes
Mn1 . N1 . 1.993(3) yes
Mn1 . N2 . 1.981(3) yes
P1 . F1 . 1.571(3) yes
P1 . F2 . 1.564(4) yes
P1 . F3 . 1.589(4) yes
P1 . F4 . 1.544(4) yes
P1 . F5 . 1.573(4) yes
P1 . F6 . 1.574(3) yes
O1 . C1 . 1.342(5) yes
O2 . C20 . 1.317(5) yes
O3 . N3 . 1.313(5) yes
N1 . C7 . 1.289(5) yes
N1 . C8 . 1.496(5) yes
N2 . C11 . 1.499(5) yes
N2 . C14 . 1.303(5) yes
N3 . C21 . 1.371(7) yes
N4 . C22 . 1.322(6) yes
N4 . C26 . 1.359(6) yes
N5 . C27 . 1.329(5) yes
N6 . C30 . 1.337(5) yes
C1 . C2 . 1.397(6) yes
C1 . C6 . 1.416(6) yes
C2 . C3 . 1.378(6) yes
C2 . H1 . 0.950(7) no
C3 . C4 . 1.390(7) yes
C3 . H2 . 0.950(7) no
C4 . C5 . 1.373(7) yes
C4 . H3 . 0.950(8) no
C5 . C6 . 1.418(6) yes
C5 . H4 . 0.951(8) no
C6 . C7 . 1.435(6) yes
C7 . H5 . 0.949(7) no
C8 . C9 . 1.540(6) yes
C8 . C10 . 1.528(6) yes
C8 . C11 . 1.571(6) yes
C9 . H6 . 0.950(7) no
C9 . H7 . 0.951(7) no
C9 . H8 . 0.947(7) no
C10 . H9 . 0.948(7) no
C10 . H10 . 0.950(6) no
C10 . H11 . 0.951(6) no
C11 . C12 . 1.532(6) yes
C11 . C13 . 1.528(6) yes
C12 . H12 . 0.949(6) no
C12 . H13 . 0.951(7) no
C12 . H14 . 0.950(6) no
C13 . H15 . 0.951(6) no
C13 . H16 . 0.952(7) no
C13 . H17 . 0.950(6) no
C14 . C15 . 1.432(6) yes
C14 . H18 . 0.949(6) no
C15 . C16 . 1.417(6) yes
C15 . C20 . 1.402(6) yes
C16 . C17 . 1.375(7) yes
C16 . H19 . 0.952(7) no
C17 . C18 . 1.385(7) yes
C17 . H20 . 0.950(9) no
C18 . C19 . 1.378(6) yes
C18 . H21 . 0.949(9) no
C19 . C20 . 1.400(6) yes
C19 . H22 . 0.949(7) no
C21 . C22 . 1.414(7) yes
C21 . H23 . 0.956(8) no
C22 . C23 . 1.411(7) yes
C23 . C24 . 1.374(8) yes
C23 . H24 . 0.948(8) no
C24 . C25 . 1.385(8) yes
C24 . H25 . 0.95(1) no
C25 . C26 . 1.391(7) yes
C25 . H26 . 0.953(8) no
C26 . H27 . 0.952(8) no
C27 . C28 . 1.383(6) yes
C27 . H28 . 0.954(7) no
C28 . C29 . 1.387(5) yes
C28 . H29 . 0.949(7) no
C29 . H30 . 0.949(9) no
C30 . C31 . 1.371(6) yes
C30 . H31 . 0.950(7) no
C31 . C32 . 1.399(6) yes
C31 . H32 . 0.951(8) no
C32 . H33 . 0.950(9) no

loop_
 _geom_angle_atom_site_label_1
 _geom_angle_site_symmetry_1
 _geom_angle_atom_site_label_2
 _geom_angle_site_symmetry_2
 _geom_angle_atom_site_label_3
 _geom_angle_site_symmetry_3
 _geom_angle
 _geom_angle_publ_flag
N3 . Ni1 . N4 . 77.54(18) yes
N3 . Ni1 . N5 . 90.76(13) yes
N4 . Ni1 . N5 . 88.7(1) yes
N3 . Ni1 . N6 . 89.24(13) yes
N4 . Ni1 . N6 . 91.3(1) yes
N5 . Ni1 . N6 . 179.995 yes
O1 . Mn1 . O2 . 93.41(12) yes
O1 . Mn1 . O3 . 91.66(11) yes
O2 . Mn1 . O3 . 97.58(12) yes
O1 . Mn1 . N1 . 91.47(13) yes
O2 . Mn1 . N1 . 173.06(14) yes
O3 . Mn1 . N1 . 87.20(13) yes
O1 . Mn1 . N2 . 165.67(12) yes
O2 . Mn1 . N2 . 92.80(13) yes
O3 . Mn1 . N2 . 100.30(12) yes
N1 . Mn1 . N2 . 81.35(14) yes
F1 . P1 . F2 . 86.1(2) yes
F1 . P1 . F3 . 89.3(2) yes
F2 . P1 . F3 . 93.2(2) yes
F1 . P1 . F4 . 176.6(3) yes
F2 . P1 . F4 . 91.3(3) yes
F3 . P1 . F4 . 88.7(2) yes
F1 . P1 . F5 . 93.0(2) yes
F2 . P1 . F5 . 178.0(2) yes
F3 . P1 . F5 . 88.5(2) yes
F4 . P1 . F5 . 89.8(3) yes
F1 . P1 . F6 . 90.98(19) yes
F2 . P1 . F6 . 90.4(2) yes
F3 . P1 . F6 . 176.5(2) yes
F4 . P1 . F6 . 91.2(2) yes
F5 . P1 . F6 . 87.9(2) yes
Mn1 . O1 . C1 . 121.9(2) yes
Mn1 . O2 . C20 . 130.4(3) yes
Mn1 . O3 . N3 . 132.4(3) yes
Mn1 . N1 . C7 . 122.4(3) yes
Mn1 . N1 . C8 . 116.3(3) yes
C7 . N1 . C8 . 121.3(3) yes
Mn1 . N2 . C11 . 115.9(2) yes
Mn1 . N2 . C14 . 123.8(3) yes
C11 . N2 . C14 . 119.6(3) yes
Ni1 . N3 . O3 . 127.0(3) yes
Ni1 . N3 . C21 . 113.1(4) yes
O3 . N3 . C21 . 119.9(4) yes
Ni1 . N4 . C22 . 115.8(3) yes
Ni1 . N4 . C26 . 126.2(4) yes
C22 . N4 . C26 . 117.9(5) yes
Ni1 . N5 . C27 . 121.3(3) yes
Ni1 . N6 . C30 . 121.9(3) yes
O1 . C1 . C2 . 119.8(4) yes
O1 . C1 . C6 . 122.1(4) yes
C2 . C1 . C6 . 118.1(4) yes
C1 . C2 . C3 . 121.7(4) yes
C1 . C2 . H1 . 119.1(5) no
C3 . C2 . H1 . 119.2(5) no
C2 . C3 . C4 . 120.4(4) yes
C2 . C3 . H2 . 119.8(6) no
C4 . C3 . H2 . 119.8(6) no
C3 . C4 . C5 . 119.7(5) yes
C3 . C4 . H3 . 120.2(6) no
C5 . C4 . H3 . 120.1(6) no
C4 . C5 . C6 . 120.9(5) yes
C4 . C5 . H4 . 119.7(6) no
C6 . C5 . H4 . 119.4(6) no
C1 . C6 . C5 . 119.2(4) yes
C1 . C6 . C7 . 123.2(4) yes
C5 . C6 . C7 . 117.5(4) yes
N1 . C7 . C6 . 125.6(4) yes
N1 . C7 . H5 . 117.1(5) no
C6 . C7 . H5 . 117.2(5) no
N1 . C8 . C9 . 111.9(3) yes
N1 . C8 . C10 . 106.2(3) yes
C9 . C8 . C10 . 109.6(3) yes
N1 . C8 . C11 . 105.5(3) yes
C9 . C8 . C11 . 110.9(3) yes
C10 . C8 . C11 . 112.6(3) yes
C8 . C9 . H6 . 109.4(5) no
C8 . C9 . H7 . 109.4(5) no
H6 . C9 . H7 . 109.3(6) no
C8 . C9 . H8 . 109.5(5) no
H6 . C9 . H8 . 109.5(6) no
H7 . C9 . H8 . 109.6(6) no
C8 . C10 . H9 . 109.5(5) no
C8 . C10 . H10 . 109.4(5) no
H9 . C10 . H10 . 109.6(6) no
C8 . C10 . H11 . 109.4(5) no
H9 . C10 . H11 . 109.5(6) no
H10 . C10 . H11 . 109.3(6) no
N2 . C11 . C8 . 106.8(3) yes
N2 . C11 . C12 . 105.4(3) yes
C8 . C11 . C12 . 111.4(3) yes
N2 . C11 . C13 . 112.2(3) yes
C8 . C11 . C13 . 110.8(3) yes
C12 . C11 . C13 . 110.2(3) yes
C11 . C12 . H12 . 109.5(5) no
C11 . C12 . H13 . 109.5(5) no
H12 . C12 . H13 . 109.4(6) no
C11 . C12 . H14 . 109.5(5) no
H12 . C12 . H14 . 109.5(6) no
H13 . C12 . H14 . 109.3(6) no
C11 . C13 . H15 . 109.5(5) no
C11 . C13 . H16 . 109.6(5) no
H15 . C13 . H16 . 109.4(6) no
C11 . C13 . H17 . 109.6(5) no
H15 . C13 . H17 . 109.4(6) no
H16 . C13 . H17 . 109.3(6) no
N2 . C14 . C15 . 126.6(4) yes
N2 . C14 . H18 . 116.8(5) no
C15 . C14 . H18 . 116.6(5) no
C14 . C15 . C16 . 116.6(4) yes
C14 . C15 . C20 . 123.7(4) yes
C16 . C15 . C20 . 119.7(4) yes
C15 . C16 . C17 . 120.7(5) yes
C15 . C16 . H19 . 119.6(6) no
C17 . C16 . H19 . 119.7(6) no
C16 . C17 . C18 . 119.4(5) yes
C16 . C17 . H20 . 120.4(7) no
C18 . C17 . H20 . 120.2(7) no
C17 . C18 . C19 . 120.7(5) yes
C17 . C18 . H21 . 119.7(6) no
C19 . C18 . H21 . 119.6(6) no
C18 . C19 . C20 . 121.4(4) yes
C18 . C19 . H22 . 119.4(5) no
C20 . C19 . H22 . 119.2(5) no
O2 . C20 . C15 . 122.6(4) yes
O2 . C20 . C19 . 119.3(4) yes
C15 . C20 . C19 . 118.1(4) yes
N3 . C21 . C22 . 118.0(5) yes
N3 . C21 . H23 . 121.0(6) no
C22 . C21 . H23 . 121.0(6) no
N4 . C22 . C21 . 115.2(5) yes
N4 . C22 . C23 . 123.2(5) yes
C21 . C22 . C23 . 121.5(6) yes
C22 . C23 . C24 . 118.0(6) yes
C22 . C23 . H24 . 120.9(7) no
C24 . C23 . H24 . 121.1(7) no
C23 . C24 . C25 . 119.7(5) yes
C23 . C24 . H25 . 120.0(7) no
C25 . C24 . H25 . 120.3(7) no
C24 . C25 . C26 . 118.7(5) yes
C24 . C25 . H26 . 120.6(7) no
C26 . C25 . H26 . 120.8(7) no
N4 . C26 . C25 . 122.3(6) yes
N4 . C26 . H27 . 118.8(6) no
C25 . C26 . H27 . 118.9(6) no
N5 . C27 . C28 . 123.4(4) yes
N5 . C27 . H28 . 118.1(5) no
C28 . C27 . H28 . 118.6(5) no
C27 . C28 . C29 . 119.1(4) yes
C27 . C28 . H29 . 120.5(5) no
C29 . C28 . H29 . 120.5(5) no
C28 . C29 . H30 . 121.2(3) no
N6 . C30 . C31 . 123.7(5) yes
N6 . C30 . H31 . 118.1(5) no
C31 . C30 . H31 . 118.2(6) no
C30 . C31 . C32 . 120.6(5) yes
C30 . C31 . H32 . 119.7(6) no
C32 . C31 . H32 . 119.7(6) no
C31 . C32 . H33 . 122.5(3) no


loop_
_geom_contact_atom_site_label_1
_geom_contact_site_symmetry_1
_geom_contact_atom_site_label_2
_geom_contact_site_symmetry_2
_geom_contact_distance
_geom_contact_publ_flag
Ni1 . O3 . 3.056(3) yes
Ni1 . O3 5_655 3.056(3) yes
Ni1 . N3 . 2.081(4) yes
Ni1 . N3 5_655 2.081(4) yes
Ni1 . N4 . 2.104(4) yes
Ni1 . N4 5_655 2.104(4) yes
Ni1 . N5 . 2.119(5) yes
Ni1 . N6 . 2.126(5) yes
Ni1 . C21 . 2.906(6) yes
Ni1 . C21 5_655 2.906(6) yes
Ni1 . C22 . 2.932(6) yes
Ni1 . C22 5_655 2.932(6) yes
Ni1 . C26 . 3.106(5) yes
Ni1 . C26 5_655 3.106(5) yes
Ni1 . C27 . 3.030(5) yes
Ni1 . C27 5_655 3.030(5) yes
Ni1 . C30 . 3.051(5) yes
Ni1 . C30 5_655 3.051(5) yes
Ni1 . H27 . 3.179(6) no
Ni1 . H27 5_655 3.179(6) no
Ni1 . H28 . 3.037(6) no
Ni1 . H28 5_655 3.037(6) no
Ni1 . H31 . 3.064(5) no
Ni1 . H31 5_655 3.064(5) no
Mn1 . O1 . 1.903(3) yes
Mn1 . O1 4_555 2.537(3) yes
Mn1 . O2 . 1.876(3) yes
Mn1 . O3 . 2.100(3) yes
Mn1 . N1 . 1.993(3) yes
Mn1 . N2 . 1.981(3) yes
Mn1 . N3 . 3.138(4) yes
Mn1 . C1 . 2.850(4) yes
Mn1 . C1 4_555 3.401(4) yes
Mn1 . C6 . 3.235(4) yes
Mn1 . C7 . 2.896(4) yes
Mn1 . C8 . 2.976(4) yes
Mn1 . C11 . 2.960(4) yes
Mn1 . C12 . 3.556(4) yes
Mn1 . C14 . 2.915(4) yes
Mn1 . C15 . 3.298(4) yes
Mn1 . C20 . 2.907(4) yes
Mn1 . C21 . 3.455(6) yes
Mn1 . H9 . 3.249(5) no
Mn1 . H14 . 3.162(5) no
Mn1 . H23 . 3.064(6) no
P1 . F1 . 1.571(3) yes
P1 . F2 . 1.564(4) yes
P1 . F3 . 1.589(4) yes
P1 . F4 . 1.544(4) yes
P1 . F5 . 1.573(4) yes
P1 . F6 . 1.574(3) yes
P1 . H19 . 3.533(6) no
P1 . H22 7_545 3.52(1) no
P1 . H26 6_554 3.24(2) no
P1 . H33 . 3.542(7) no
F1 . F2 . 2.139(5) yes
F1 . F3 . 2.222(5) yes
F1 . F4 . 3.113(5) yes
F1 . F5 . 2.280(5) yes
F1 . F6 . 2.243(5) yes
F1 . C9 2_655 3.363(6) yes
F1 . C14 . 3.587(5) yes
F1 . C31 . 3.168(6) yes
F1 . C32 . 3.127(5) yes
F1 . H6 2_655 3.30(1) no
F1 . H7 2_655 3.25(2) no
F1 . H8 2_655 2.99(2) no
F1 . H12 . 3.194(6) no
F1 . H17 . 2.826(6) no
F1 . H18 . 2.796(6) no
F1 . H19 . 3.285(7) no
F1 . H26 6_554 3.30(2) no
F1 . H32 . 2.800(7) no
F1 . H33 . 2.764(7) no
F2 . F3 . 2.290(6) yes
F2 . F4 . 2.221(7) yes
F2 . F5 . 3.136(5) yes
F2 . F6 . 2.226(5) yes
F2 . C24 6_554 3.205(7) yes
F2 . C25 6_554 3.252(7) yes
F2 . H2 1_545 3.27(3) no
F2 . H17 . 3.259(7) no
F2 . H18 . 3.252(7) no
F2 . H19 . 3.218(8) no
F2 . H24 7_545 3.39(2) no
F2 . H25 7_545 3.14(2) no
F2 . H25 6_554 2.57(3) no
F2 . H26 6_554 2.68(4) no
F3 . F4 . 2.190(6) yes
F3 . F5 . 2.208(5) yes
F3 . F6 . 3.162(4) yes
F3 . C9 2_655 3.502(6) yes
F3 . C25 6_554 3.189(7) yes
F3 . H2 1_545 3.16(3) no
F3 . H4 2_655 3.50(2) no
F3 . H5 2_655 3.21(2) no
F3 . H7 2_655 3.03(2) no
F3 . H8 2_655 3.10(2) no
F3 . H26 6_554 2.25(3) no
F3 . H29 5_645 2.93(3) no
F3 . H30 1_545 3.18(3) no
F4 . F5 . 2.200(7) yes
F4 . F6 . 2.228(5) yes
F4 . C18 7_545 3.049(7) yes
F4 . C19 7_545 3.244(6) yes
F4 . C28 5_645 3.412(7) yes
F4 . H2 1_545 2.83(3) no
F4 . H21 7_545 2.34(3) no
F4 . H22 7_545 2.74(2) no
F4 . H24 7_545 3.41(2) no
F4 . H29 5_645 2.80(4) no
F4 . H30 1_545 3.31(4) no
F5 . F6 . 2.185(5) yes
F5 . C29 1_545 3.434(7) yes
F5 . C32 . 3.483(8) yes
F5 . H7 6_555 2.98(2) no
F5 . H22 7_545 3.29(2) no
F5 . H30 1_545 2.61(4) no
F5 . H32 . 3.521(7) no
F5 . H33 . 2.658(7) no
F6 . C16 . 3.208(6) yes
F6 . C23 7_545 3.383(7) yes
F6 . H10 6_555 3.03(2) no
F6 . H18 . 3.575(6) no
F6 . H19 . 2.385(6) no
F6 . H22 7_545 2.76(1) no
F6 . H24 7_545 2.48(2) no
F6 . H32 . 3.173(6) no
O1 . O2 . 2.750(4) yes
O1 . O2 4_555 2.933(4) yes
O1 . O3 . 2.874(4) yes
O1 . N1 . 2.791(4) yes
O1 . N1 4_555 3.337(4) yes
O1 . N2 4_555 3.153(4) yes
O1 . C1 . 1.342(5) yes
O1 . C2 . 2.369(5) yes
O1 . C6 . 2.413(5) yes
O1 . C7 . 2.917(5) yes
O1 . C10 4_555 3.304(5) yes
O1 . C20 4_555 3.581(5) yes
O1 . H1 . 2.548(6) no
O1 . H9 4_555 2.486(9) no
O1 . H10 4_555 3.505(7) no
O1 . H23 . 3.247(7) no
O2 . O3 . 2.994(4) yes
O2 . N1 4_555 3.422(4) yes
O2 . N2 . 2.794(4) yes
O2 . N3 . 3.352(6) yes
O2 . C1 4_555 3.173(5) yes
O2 . C6 4_555 3.329(5) yes
O2 . C7 4_555 3.333(5) yes
O2 . C14 . 2.908(5) yes
O2 . C15 . 2.385(5) yes
O2 . C19 . 2.344(5) yes
O2 . C20 . 1.317(5) yes
O2 . C21 . 2.914(6) yes
O2 . H9 4_555 3.395(7) no
O2 . H10 4_555 3.10(1) no
O2 . H22 . 2.527(7) no
O2 . H23 . 2.227(7) no
O3 . N1 . 2.823(4) yes
O3 . N2 . 3.134(4) yes
O3 . N3 . 1.313(5) yes
O3 . N4 5_655 3.487(5) yes
O3 . N6 . 3.593(4) yes
O3 . C1 . 3.102(5) yes
O3 . C6 . 3.277(5) yes
O3 . C7 . 3.232(5) yes
O3 . C12 . 3.339(5) yes
O3 . C21 . 2.323(7) yes
O3 . C22 . 3.589(6) yes
O3 . C26 5_655 3.183(7) yes
O3 . H14 . 2.519(6) no
O3 . H23 . 2.543(8) no
O3 . H27 5_655 2.38(2) no
O3 . H28 5_655 2.80(2) no
O3 . H31 . 3.240(6) no
N1 . N2 . 2.590(5) yes
N1 . C1 . 2.978(5) yes
N1 . C6 . 2.424(5) yes
N1 . C7 . 1.289(5) yes
N1 . C8 . 1.496(5) yes
N1 . C9 . 2.516(5) yes
N1 . C10 . 2.419(5) yes
N1 . C11 . 2.443(5) yes
N1 . C12 . 3.078(5) yes
N1 . H5 . 1.917(6) no
N1 . H6 . 3.323(7) no
N1 . H7 . 2.686(8) no
N1 . H8 . 2.724(6) no
N1 . H9 . 2.619(6) no
N1 . H10 . 2.560(6) no
N1 . H11 . 3.250(6) no
N1 . H13 . 3.507(6) no
N1 . H14 . 2.747(7) no
N1 . H27 5_655 3.38(3) no
N2 . C1 4_555 3.489(5) yes
N2 . C2 4_555 3.478(5) yes
N2 . C8 . 2.464(5) yes
N2 . C10 . 3.131(5) yes
N2 . C11 . 1.499(5) yes
N2 . C12 . 2.410(5) yes
N2 . C13 . 2.513(5) yes
N2 . C14 . 1.303(5) yes
N2 . C15 . 2.444(5) yes
N2 . C20 . 2.990(5) yes
N2 . H1 4_555 3.21(1) no
N2 . H9 . 2.792(6) no
N2 . H12 . 2.581(6) no
N2 . H13 . 3.245(6) no
N2 . H14 . 2.574(6) no
N2 . H15 . 2.620(5) no
N2 . H16 . 3.314(7) no
N2 . H17 . 2.795(6) no
N2 . H18 . 1.927(6) no
N3 . N4 . 2.621(6) yes
N3 . N4 5_655 3.264(7) yes
N3 . N5 . 2.990(6) yes
N3 . N6 . 2.955(5) yes
N3 . C21 . 1.371(7) yes
N3 . C22 . 2.386(7) yes
N3 . C26 5_655 3.484(8) yes
N3 . C27 5_655 3.094(7) yes
N3 . C30 . 3.083(7) yes
N3 . H14 . 3.343(7) no
N3 . H23 . 2.035(8) no
N3 . H27 5_655 2.95(2) no
N3 . H28 5_655 2.57(2) no
N3 . H31 . 2.603(7) no
N4 . N5 . 2.952(5) yes
N4 . N6 . 3.025(5) yes
N4 . C21 . 2.310(7) yes
N4 . C22 . 1.322(6) yes
N4 . C23 . 2.405(7) yes
N4 . C24 . 2.783(7) yes
N4 . C25 . 2.409(6) yes
N4 . C26 . 1.359(6) yes
N4 . C27 . 3.449(6) yes
N4 . C30 . 3.259(6) yes
N4 . H23 . 3.19(1) no
N4 . H24 . 3.250(8) no
N4 . H26 . 3.265(7) no
N4 . H27 . 2.000(8) no
N4 . H28 . 3.315(6) no
N4 . H31 . 2.853(6) no
N5 . C21 . 3.523(6) yes
N5 . C21 5_655 3.523(6) yes
N5 . C22 . 3.548(6) yes
N5 . C22 5_655 3.548(6) yes
N5 . C27 . 1.329(5) yes
N5 . C27 5_655 1.329(5) yes
N5 . C28 . 2.388(6) yes
N5 . C28 5_655 2.388(6) yes
N5 . C29 . 2.789(8) yes
N5 . H28 . 1.967(6) no
N5 . H28 5_655 1.967(6) no
N5 . H29 . 3.233(7) no
N5 . H29 5_655 3.233(7) no
N6 . C30 . 1.337(5) yes
N6 . C30 5_655 1.337(5) yes
N6 . C31 . 2.387(6) yes
N6 . C31 5_655 2.387(6) yes
N6 . C32 . 2.827(8) yes
N6 . H12 . 3.491(6) no
N6 . H12 5_655 3.491(6) no
N6 . H14 . 3.479(5) no
N6 . H14 5_655 3.479(5) no
N6 . H31 . 1.972(4) no
N6 . H31 5_655 1.972(4) no
N6 . H32 . 3.229(7) no
N6 . H32 5_655 3.229(7) no
C1 . C2 . 1.397(6) yes
C1 . C3 . 2.424(6) yes
C1 . C4 . 2.815(7) yes
C1 . C5 . 2.445(7) yes
C1 . C6 . 1.416(6) yes
C1 . C7 . 2.508(6) yes
C1 . C14 4_555 3.562(6) yes
C1 . C15 4_555 3.482(6) yes
C1 . C20 4_555 3.329(6) yes
C1 . H1 . 2.036(7) no
C1 . H2 . 3.276(6) no
C1 . H4 . 3.301(9) no
C1 . H5 . 3.325(8) no
C1 . H9 4_555 3.12(1) no
C1 . H28 5_655 3.39(4) no
C2 . C3 . 1.378(6) yes
C2 . C4 . 2.402(7) yes
C2 . C5 . 2.767(7) yes
C2 . C6 . 2.412(6) yes
C2 . C14 4_555 3.327(6) yes
C2 . C15 4_555 3.510(6) yes
C2 . H1 . 0.950(7) no
C2 . H2 . 2.026(6) no
C2 . H3 . 3.259(9) no
C2 . H9 4_555 2.94(1) no
C2 . H15 4_555 3.48(1) no
C2 . H28 5_655 3.33(4) no
C2 . H29 5_655 3.45(4) no
C3 . C4 . 1.390(7) yes
C3 . C5 . 2.388(7) yes
C3 . C6 . 2.788(6) yes
C3 . H1 . 2.020(8) no
C3 . H2 . 0.950(7) no
C3 . H3 . 2.040(9) no
C3 . H4 . 3.247(9) no
C3 . H28 5_655 3.53(3) no
C3 . H29 5_655 2.91(4) no
C4 . C5 . 1.373(7) yes
C4 . C6 . 2.428(6) yes
C4 . H1 . 3.255(9) no
C4 . H2 . 2.036(8) no
C4 . H3 . 0.950(8) no
C4 . H4 . 2.020(8) no
C4 . H29 5_655 3.37(3) no
C5 . C6 . 1.418(6) yes
C5 . C7 . 2.439(6) yes
C5 . H2 . 3.245(8) no
C5 . H3 . 2.024(7) no
C5 . H3 2_665 3.438(4) no
C5 . H4 . 0.951(8) no
C5 . H5 . 2.565(7) no
C6 . C7 . 1.435(6) yes
C6 . C20 4_555 3.292(6) yes
C6 . H1 . 3.272(8) no
C6 . H3 . 3.286(7) no
C6 . H4 . 2.059(7) no
C6 . H5 . 2.051(7) no
C6 . H27 5_655 3.48(3) no
C6 . H28 5_655 3.60(3) no
C7 . C8 . 2.430(6) yes
C7 . C9 . 2.822(6) yes
C7 . C10 . 3.197(6) yes
C7 . C20 4_555 3.596(6) yes
C7 . H4 . 2.586(7) no
C7 . H5 . 0.949(7) no
C7 . H7 . 2.592(7) no
C7 . H8 . 2.937(6) no
C7 . H9 . 3.555(7) no
C7 . H10 . 2.966(7) no
C7 . H14 . 3.487(7) no
C7 . H22 4_555 3.45(3) no
C7 . H27 5_655 3.22(3) no
C8 . C9 . 1.540(6) yes
C8 . C10 . 1.528(6) yes
C8 . C11 . 1.571(6) yes
C8 . C12 . 2.563(6) yes
C8 . C13 . 2.551(6) yes
C8 . H5 . 2.537(6) no
C8 . H6 . 2.061(7) no
C8 . H7 . 2.061(8) no
C8 . H8 . 2.060(6) no
C8 . H9 . 2.050(7) no
C8 . H10 . 2.050(7) no
C8 . H11 . 2.051(6) no
C8 . H12 . 3.379(7) no
C8 . H13 . 2.767(8) no
C8 . H14 . 2.708(8) no
C8 . H15 . 2.814(6) no
C8 . H16 . 2.642(6) no
C8 . H17 . 3.362(6) no
C9 . C10 . 2.506(7) yes
C9 . C11 . 2.562(6) yes
C9 . C12 . 2.903(6) yes
C9 . C13 . 3.206(7) yes
C9 . H5 . 2.408(7) no
C9 . H6 . 0.950(7) no
C9 . H7 . 0.951(7) no
C9 . H8 . 0.947(7) no
C9 . H9 . 3.326(6) no
C9 . H10 . 2.715(7) no
C9 . H11 . 2.643(7) no
C9 . H12 2_655 3.506(7) no
C9 . H13 . 2.588(7) no
C9 . H14 . 3.063(6) no
C9 . H16 . 2.839(7) no
C9 . H32 6_554 3.48(2) no
C9 . H33 2_655 3.37(2) no
C10 . C11 . 2.578(6) yes
C10 . C13 . 2.920(6) yes
C10 . H1 4_555 3.08(2) no
C10 . H5 . 3.256(7) no
C10 . H6 . 2.679(6) no
C10 . H7 . 2.683(6) no
C10 . H8 . 3.324(8) no
C10 . H9 . 0.948(7) no
C10 . H10 . 0.950(6) no
C10 . H11 . 0.951(6) no
C10 . H15 . 2.695(6) no
C10 . H16 . 2.972(7) no
C10 . H20 6_554 3.42(3) no
C10 . H32 6_554 3.59(2) no
C11 . C12 . 1.532(6) yes
C11 . C13 . 1.528(6) yes
C11 . C14 . 2.423(6) yes
C11 . H6 . 2.774(8) no
C11 . H7 . 3.379(8) no
C11 . H8 . 2.698(7) no
C11 . H9 . 2.696(8) no
C11 . H10 . 3.386(7) no
C11 . H11 . 2.822(7) no
C11 . H12 . 2.054(7) no
C11 . H13 . 2.055(6) no
C11 . H13 2_655 3.511(4) no
C11 . H14 . 2.055(7) no
C11 . H15 . 2.052(6) no
C11 . H16 . 2.054(6) no
C11 . H17 . 2.052(6) no
C11 . H18 . 2.517(7) no
C12 . C13 . 2.509(6) yes
C12 . C14 . 3.104(6) yes
C12 . H6 . 3.180(7) no
C12 . H6 2_655 3.419(7) no
C12 . H8 . 2.507(7) no
C12 . H12 . 0.949(6) no
C12 . H13 . 0.951(7) no
C12 . H13 2_655 2.970(2) no
C12 . H14 . 0.950(6) no
C12 . H15 . 3.315(8) no
C12 . H16 . 2.807(7) no
C12 . H16 2_655 3.221(6) no
C12 . H17 . 2.582(6) no
C12 . H18 . 3.135(7) no
C12 . H27 5_655 3.32(2) no
C13 . C14 . 2.840(6) yes
C13 . H1 4_555 3.54(2) no
C13 . H6 . 2.934(8) no
C13 . H8 . 3.510(7) no
C13 . H9 . 3.024(7) no
C13 . H11 . 2.666(7) no
C13 . H12 . 2.692(8) no
C13 . H13 . 2.682(7) no
C13 . H13 2_655 3.058(6) no
C13 . H14 . 3.328(7) no
C13 . H15 . 0.951(6) no
C13 . H16 . 0.952(7) no
C13 . H17 . 0.950(6) no
C13 . H18 . 2.431(7) no
C14 . C15 . 1.432(6) yes
C14 . C16 . 2.424(7) yes
C14 . C20 . 2.499(6) yes
C14 . H1 4_555 3.26(1) no
C14 . H12 . 2.864(6) no
C14 . H14 . 3.413(6) no
C14 . H15 . 2.819(6) no
C14 . H17 . 2.749(7) no
C14 . H18 . 0.949(6) no
C14 . H19 . 2.570(8) no
C14 . H32 . 3.51(1) no
C15 . C16 . 1.417(6) yes
C15 . C17 . 2.427(7) yes
C15 . C18 . 2.779(7) yes
C15 . C19 . 2.404(6) yes
C15 . C20 . 1.402(6) yes
C15 . H18 . 2.042(7) no
C15 . H19 . 2.061(7) no
C15 . H20 . 3.288(9) no
C15 . H22 . 3.261(7) no
C15 . H31 . 3.532(9) no
C15 . H32 . 3.45(1) no
C16 . C17 . 1.375(7) yes
C16 . C18 . 2.383(7) yes
C16 . C19 . 2.764(7) yes
C16 . C20 . 2.438(6) yes
C16 . H18 . 2.527(8) no
C16 . H19 . 0.952(7) no
C16 . H20 . 2.029(9) no
C16 . H21 . 3.24(1) no
C16 . H24 7_545 3.37(1) no
C16 . H32 . 3.31(1) no
C17 . C18 . 1.385(7) yes
C17 . C19 . 2.401(7) yes
C17 . C20 . 2.814(7) yes
C17 . H11 6_555 3.33(3) no
C17 . H19 . 2.023(9) no
C17 . H20 . 0.950(9) no
C17 . H21 . 2.031(9) no
C17 . H22 . 3.252(8) no
C17 . H24 7_545 3.47(1) no
C18 . C19 . 1.378(6) yes
C18 . C20 . 2.422(6) yes
C18 . H19 . 3.243(9) no
C18 . H20 . 2.035(8) no
C18 . H21 . 0.949(9) no
C18 . H22 . 2.021(7) no
C19 . C20 . 1.400(6) yes
C19 . H5 4_555 3.56(3) no
C19 . H10 4_555 3.59(2) no
C19 . H20 . 3.258(8) no
C19 . H21 . 2.023(8) no
C19 . H22 . 0.949(7) no
C19 . H23 . 3.296(7) no
C19 . H24 . 3.403(8) no
C20 . C21 . 3.477(7) yes
C20 . H18 . 3.318(7) no
C20 . H19 . 3.295(7) no
C20 . H21 . 3.274(9) no
C20 . H22 . 2.039(7) no
C20 . H23 . 2.935(7) no
C20 . H31 . 3.565(9) no
C21 . C22 . 1.414(7) yes
C21 . C23 . 2.465(8) yes
C21 . C26 . 3.564(8) yes
C21 . C30 . 3.450(7) yes
C21 . H20 7_555 3.05(2) no
C21 . H23 . 0.956(8) no
C21 . H24 . 2.67(1) no
C21 . H28 5_655 3.26(2) no
C21 . H31 . 2.673(7) no
C22 . C23 . 1.411(7) yes
C22 . C24 . 2.387(7) yes
C22 . C25 . 2.723(8) yes
C22 . C26 . 2.297(8) yes
C22 . C30 . 3.516(7) yes
C22 . H20 7_555 3.13(2) no
C22 . H23 . 2.075(9) no
C22 . H24 . 2.066(9) no
C22 . H25 . 3.25(1) no
C22 . H27 . 3.15(1) no
C22 . H31 . 2.789(7) no
C23 . C24 . 1.374(8) yes
C23 . C25 . 2.386(8) yes
C23 . C26 . 2.734(8) yes
C23 . H19 7_555 3.14(2) no
C23 . H20 7_555 3.09(2) no
C23 . H23 . 2.674(8) no
C23 . H24 . 0.948(8) no
C23 . H25 . 2.023(9) no
C23 . H26 . 3.25(1) no
C24 . C25 . 1.385(8) yes
C24 . C26 . 2.388(9) yes
C24 . H2 6_565 3.43(2) no
C24 . H3 6_565 3.53(3) no
C24 . H19 7_555 3.52(2) no
C24 . H24 . 2.033(9) no
C24 . H25 . 0.95(1) no
C24 . H26 . 2.04(1) no
C24 . H27 . 3.25(1) no
C25 . C26 . 1.391(7) yes
C25 . H2 6_565 3.43(2) no
C25 . H3 6_565 3.03(3) no
C25 . H8 5_655 3.58(3) no
C25 . H17 6_555 3.46(2) no
C25 . H24 . 3.25(1) no
C25 . H25 . 2.04(1) no
C25 . H26 . 0.953(8) no
C25 . H27 . 2.03(1) no
C26 . H3 6_565 3.32(2) no
C26 . H14 5_655 2.96(1) no
C26 . H25 . 3.25(1) no
C26 . H26 . 2.050(9) no
C26 . H27 . 0.952(8) no
C26 . H28 . 3.339(8) no
C27 . C28 . 1.383(6) yes
C27 . C28 5_655 2.703(6) yes
C27 . C29 . 2.387(7) yes
C27 . H28 . 0.954(7) no
C27 . H28 5_655 3.131(2) no
C27 . H29 . 2.036(7) no
C27 . H30 . 3.253(8) no
C28 . C29 . 1.387(5) yes
C28 . H4 6_565 3.26(2) no
C28 . H21 3_555 3.11(3) no
C28 . H28 . 2.021(7) no
C28 . H29 . 0.949(7) no
C28 . H29 5_655 3.240(2) no
C28 . H30 . 2.046(7) no
C29 . H21 3_555 3.50(2) no
C29 . H21 7_555 3.50(2) no
C29 . H28 . 3.243(7) no
C29 . H28 5_655 3.243(7) no
C29 . H29 . 2.039(7) no
C29 . H29 5_655 2.039(7) no
C29 . H30 . 0.949(9) no
C30 . C31 . 1.371(6) yes
C30 . C31 5_655 2.690(7) yes
C30 . C32 . 2.406(7) yes
C30 . H12 . 3.179(7) no
C30 . H14 . 3.536(7) no
C30 . H31 . 0.950(7) no
C30 . H31 5_655 3.130(2) no
C30 . H32 . 2.019(7) no
C30 . H33 . 3.274(8) no
C31 . C32 . 1.399(6) yes
C31 . H6 6_555 2.86(2) no
C31 . H11 6_555 3.53(2) no
C31 . H12 . 3.097(7) no
C31 . H31 . 2.003(7) no
C31 . H32 . 0.951(8) no
C31 . H32 5_655 3.231(2) no
C31 . H33 . 2.070(7) no
C32 . H6 2_655 2.93(2) no
C32 . H6 6_555 2.93(2) no
C32 . H7 2_655 3.45(2) no
C32 . H7 6_555 3.45(2) no
C32 . H12 . 3.401(6) no
C32 . H12 5_655 3.401(6) no
C32 . H31 . 3.252(7) no
C32 . H31 5_655 3.252(7) no
C32 . H32 . 2.044(6) no
C32 . H32 5_655 2.044(6) no
C32 . H33 . 0.950(9) no
 

#==============================================================================

# Additional structures and associated data_? identifiers
# should be added at this point if there is more than one 
# structure analysis in the CIF.

#==============================================================================

#     End of CIF

#==============================================================================
